# Supplementary material
Source: publisher figshare collection journal article supplement (https://frontiersin.figshare.com/ndownloader/files/27503408)
Supplement: Supplementary file 1 [file 27503408]

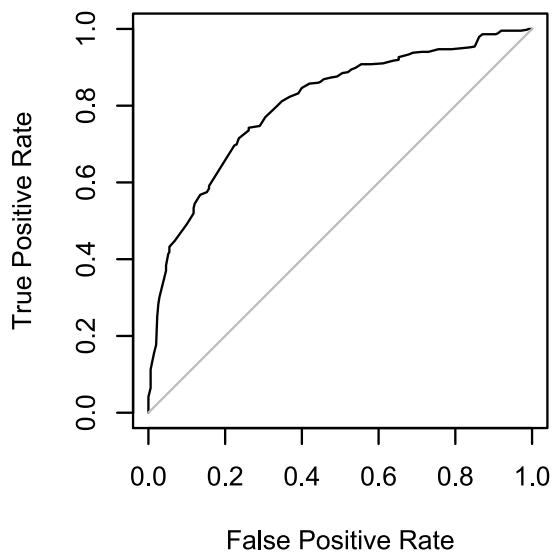

**Figure S-2. Receiver Operating Characteristic (ROC) diagnostic curve for predicted eDNA detection.** Grey line indicates null (random classifier) expectation.
